# Supplementary material for: Nonclassical dual control of circularly polarized luminescence modes of binaphthyl–pyrene organic fluorophores in fluidic and glassy media
Source: Royal Society of Chemistry journal article supplement (doi:10.1039/c4cc02946a), 2014-01-01
Supplement: c4cc02946a1.pdf [file c4cc02946a1.pdf]

## Supporting Information

### **Nonclassical Dual Controlling Circularly Polarized Luminescence Modes of Binaphthyl–Pyrene Organic Fluorophores in Fluidic and Glassy Media**

Kazuki Nakabayashi,<sup>a</sup> Tomoyuki Amako,<sup>a</sup> Nobuo Tajima,<sup>b</sup> Michiya Fujiki,<sup>c\*</sup> and Yoshitane Imai<sup>a\*</sup>

<sup>a</sup> Department of Applied Chemistry, Faculty of Science and Engineering, Kinki University, 3-4-1  
Kowakae, Higashi-Osaka, Osaka 577-8502, Japan.

<sup>b</sup> First-Principles Simulation Group, Computational Materials Science Center, NIMS, Sengen,  
Tsukuba, Ibaraki 305-0047, Japan.

<sup>c</sup> Graduate School of Materials Science, Nara Institute of Science and Technology, Takayama, Ikoma,  
Nara 630-0192, Japan.

Correspondence to: (Y.I.) y-imai@apch.kindai.ac.jp. (M.F.) fujikim@ms.naist.jp.

## 1. Experimental

### 1.1. General methods

Chloroform ( $\text{CHCl}_3$ ), purchased from Wako Pure Chemical (Osaka, Japan), was used for optical measurements. Compounds (*R*)-**1** and (*S*)-**1** were prepared using a previously reported method.<sup>1</sup>

### 1.2. Syntheses of (*R*)-**2** and (*S*)-**2**

The reaction mixture of (*R*)-2'-ethoxy-1,1'-binaphthalene-2-ol (314 mg, 1.00 mmol), 2-(2-chloroethoxy)ethanol (0.22 mL, 2.00 mmol) and potassium carbonate ( $\text{K}_2\text{CO}_3$ ) (415 mg, 3.00 mmol) in dry *N,N*-dimethylformamide (DMF) (30 mL) was stirred for 24 h under argon atmosphere at 120 °C. After filtration, the reaction mixture was concentrated under vacuum. Dichloromethane ( $\text{CH}_2\text{Cl}_2$ ) was added to the residue, and the mixture was washed with brine. The organic layer was dried over anhydrous magnesium sulfate ( $\text{MgSO}_4$ ) and concentrated under vacuum. The crude product was purified by silica gel column chromatography (eluent: ethyl acetate/hexane = 1/1). The (*R*)-binaphthyl intermediate was obtained as a pale yellow viscous liquid [369 mg (Yield: 92%)].

The (*R*)-binaphthyl intermediate (403 mg, 1.00 mmol) was added to a mixture of 1-pyreneacetic acid (390 mg, 1.50 mmol), *N,N'*-dicyclohexylcarbodiimide (413 mg, 2.00 mmol), and 4-*N,N*-dimethylaminopyridine (122 mg, 1.00 mmol) in dry  $\text{CH}_2\text{Cl}_2$  (50 mL). The reaction mixture was stirred for 24 h under argon atmosphere at room temperature. Then,  $\text{CH}_2\text{Cl}_2$  was added to the reaction mixture and washed with saturated aqueous sodium bicarbonate ( $\text{NaHCO}_3$ ) and brine. The organic layer was dried over anhydrous  $\text{MgSO}_4$  and concentrated under vacuum. The crude product was purified by silica gel column chromatography (eluent: ethyl acetate/hexane = 1/2). (*R*)-**2** was obtained as a pale yellow viscous solid [438 mg (Yield: 68%)]. (*S*)-**2** was prepared by the same procedure in 62% overall yield, from (*S*)-2'-ethoxy-1,1'-binaphthalene-2-ol. <sup>1</sup>H NMR (acetone-*d*<sub>6</sub>, 400 MHz)  $\delta$  8.08-8.26 (m, 7H), 8.03 (t, *J* = 7.8 Hz, 1H), 7.87-7.96 (m, 4H), 7.82 (d, *J* = 7.8 Hz, 1H), 7.42 (d, *J* = 8.7 Hz, 2H), 7.11-7.32 (m, 4H), 7.03 (d, *J* = 8.7 Hz, 1H), 6.99 (d, *J* = 8.7 Hz, 1H), 4.32 (s, 2H), 3.95-4.02 (m, 4H), 3.84-3.87 (m, 2H), 3.32 (t, *J* = 4.6 Hz, 2H), 3.09-3.19 (m, 2H), 0.94 (t, *J* = 6.9 Hz, 3H).

### 1.3. Measurement of the fluorescence spectra

Fluorescence spectra and absolute photoluminescence quantum yields in  $\text{CHCl}_3$  solution and poly(methyl methacrylate) (PMMA) film were measured using an absolute unpolarized photoluminescence (PL) quantum yield measurement system (Hamamatsu Photonics C9920-02, Hamamatsu, Japan) under air atmosphere at room temperature. PMMA films doped with chiral **1** or **2** were prepared using a spin coater at 3000 rpm (Opticoat MS-A100, Mikasa, Tokyo, Japan). Chiral **1** or **2**-doped PMMA films were prepared by drop-casting tetrahydrofuran (THF) solutions, in which the PMMA concentration was fixed at 0.1 g/mL, onto quartz plates. Chiral **1** (or **2**) was added to the PMMA/THF solutions at concentrations of 0.01 mol/L. The cast films were dried at room temperature. Chiral **1**, dissolved in  $\text{CHCl}_3$ , was also excited at 340 nm, at all measured concentrations. Chiral **1** in PMMA film was excited at 340 nm. Chiral **2**, both when dissolved in  $\text{CHCl}_3$  and when dispersed in a PMMA film, was excited at 340 nm.

The circularly polarized luminescence (CPL) spectra in  $\text{CHCl}_3$  solution and PMMA film were measured using a JASCO CPL-200 spectrofluoropolarimeter (Tokyo, Japan), at room temperature. The instrument used a scattering angle of  $0^\circ$  from the excitation of unpolarized, monochromated incident light with a bandwidth of 10 nm. Chiral **1** and **2** were excited at 340 nm, both when dissolved in  $\text{CHCl}_3$  and when dispersed in a PMMA film. The CPL spectra were approximated using the simple moving average (SMA) method.

#### **1.4. Measurement of the circular dichroism (CD) and UV absorption spectra**

CD and UV absorption spectra for all compounds when dissolved in  $\text{CHCl}_3$  or dispersed in PMMA film were measured using a JASCO J-820 spectropolarimeter, at room temperature. The CD spectra were approximated using the SMA method.

#### **References**

1. E. J. Jun, H. N. Won, J. S. Kim, K-H. Lee and J. Yoon, *Tetrahedron Lett.*, 2006, **47**, 4577.
